# Supplementary material for: Building a chimera of aptamer–antisense oligonucleotide for silencing galectin-1 gene
Source: Royal Society of Chemistry journal article supplement (doi:10.1039/c6ra21250f), 2016-01-01
Supplement: c6ra21250f1.pdf [file c6ra21250f1.pdf]

## **Building a chimera of aptamer-antisense oligonucleotide for silencing Galectin-1 gene**

Shanni Hong,<sup>ab</sup> Na Sun,<sup>b</sup> Min Liu,<sup>\*b</sup> Jine Wang<sup>b</sup> and Renjun Pei<sup>\*b</sup>

<sup>a</sup> School of Nano Technology and Nano Bionics, University of Science and Technology of China, Hefei 230026, China.

<sup>b</sup> Suzhou Institute of Nano-Tech and Nano-Bionics, Chinese Academy of Sciences, Suzhou 215123, China.

\*Corresponding author. Key Laboratory of Nano-Bio Interface, Suzhou Institute of Nano-Tech and Nano-Bionics, Chinese Academy of Sciences, Suzhou, 215123, China.

Tel: +86-512-62872776, E-mail: [rjpei2011@sinano.ac.cn](mailto:rjpei2011@sinano.ac.cn).

Table S1. The sequences and modifications of DNA oligonucleotide sequences used in this paper.

| Name         | Sequence (5'-3')                                                                    |
|--------------|-------------------------------------------------------------------------------------|
| Apt-AS       | TTGGTGGTGGTGGTGGTTGTGGTGGTGGTGG(C6 Spacer)TTCG<br>TATCCATCTGGCAGC                   |
| Apt-AS488    | TTGGTGGTGGTGGTGGTTGTGGTGGTGGTGG(C6 Spacer)TTCG<br>TATCCATCTGGCAGC- <b>Alexa 488</b> |
| AS           | TTCGTATCCATCTGGCAGC                                                                 |
| AS488        | TTCGTATCCATCTGGCAGC- <b>Alexa 488</b>                                               |
| Galectin-1-F | CCGCTCGAGATGGCTTGTGGTCTGGTCG<br><i>XhoI</i>                                         |
| Galectin-1-R | ATTTGCGGCCGCTCAGTCAAAGGCCACACATTT<br><i>NotI</i>                                    |
| qPCR-GAL-F   | CAAACCTGGAGAGTGCCTTC                                                                |
| qPCR-GAL-R   | GTTGAAGCGAGGGTTGAAGT                                                                |
| β-ACTIN-F    | TGGCACCACACCTTCTACAATG                                                              |
| β-ACTIN-R    | TCTCAAACATGATCTGGGTCATCT                                                            |

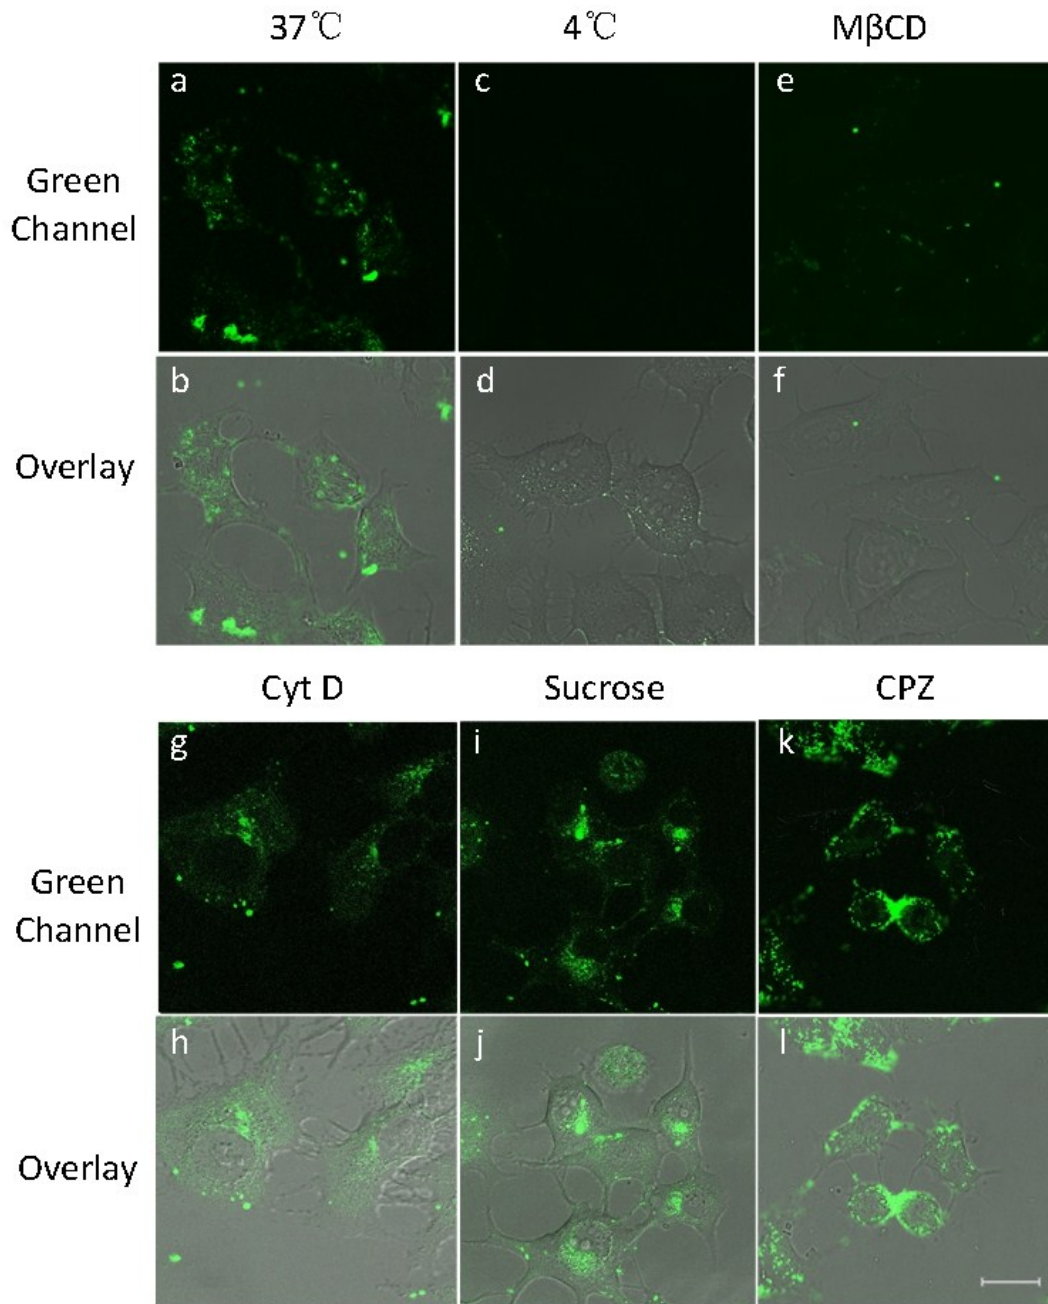

Figure S1. Endocytosis pathway analysis of Apt-AS488 when entering into MCF-7 cells. Confocal fluorescence images of MCF-7 cells after incubation with 10mM MβCD (e, f), 10 μM Cyt D (g, h), 450 mM sucrose (i, j), and 10 μg/mL CPZ (k, l) before internalization of Apt-AS488. (a, b) MCF-7 cells after incubation with Apt-AS488 at 37°C without any pretreatment. (c, d) MCF-7 cells were pretreated in 4°C for 30 min, and then incubated with Apt-AS488 in 4°C. Excitation wavelength was set at

488 nm, and the emission wavelength was 510-580 nm, scale bar: 20  $\mu$ m.

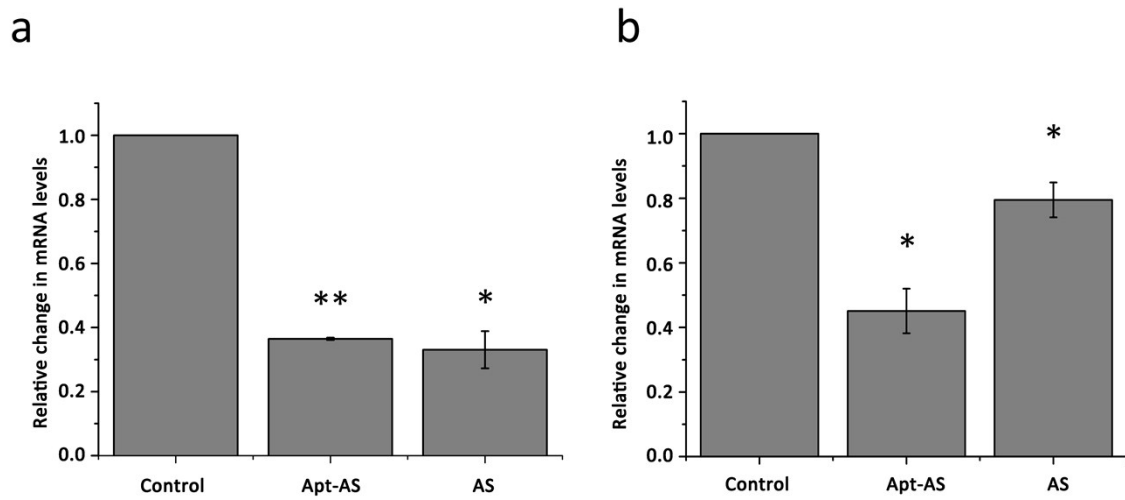

Figure S2. Quantitative polymerase chain reaction (qPCR) of positive control (a) and experimental group (b) with SYBR green method. The Control means the MCF-7 cells only transfect with psiCheck2-Gal-1. The endogenous control was  $\beta$ -actin, and the fold change in expression is plotted. \* $p$ <0.1, \*\* $p$ <0.05,  $n$ =6.
